# Supplementary material
Source: PubMed Central journal article supplement (PMC3545475)
Supplement: NIHMS420701-supplement-01.pdf [file NIHMS420701-supplement-01.pdf]

**Cell Stem Cell, volume 11**  
**Supplemental Information**

**The Transcriptional Landscape  
of Hematopoietic Stem Cell Ontogeny**

**Shannon McKinney-Freeman, Patrick Cahan, Hu Li Scott A. Lacadie, Hsuan-Ting  
Huang, Matthew Curran Sabine Loewer, Olaia Naveiras, Katie L. Kathrein,  
Martina Konantz, Erin M. Langdon, Claudia Lengerke, Leonard I. Zon, James J.  
Collins, and George Q. Daley**

**Figure S1.**

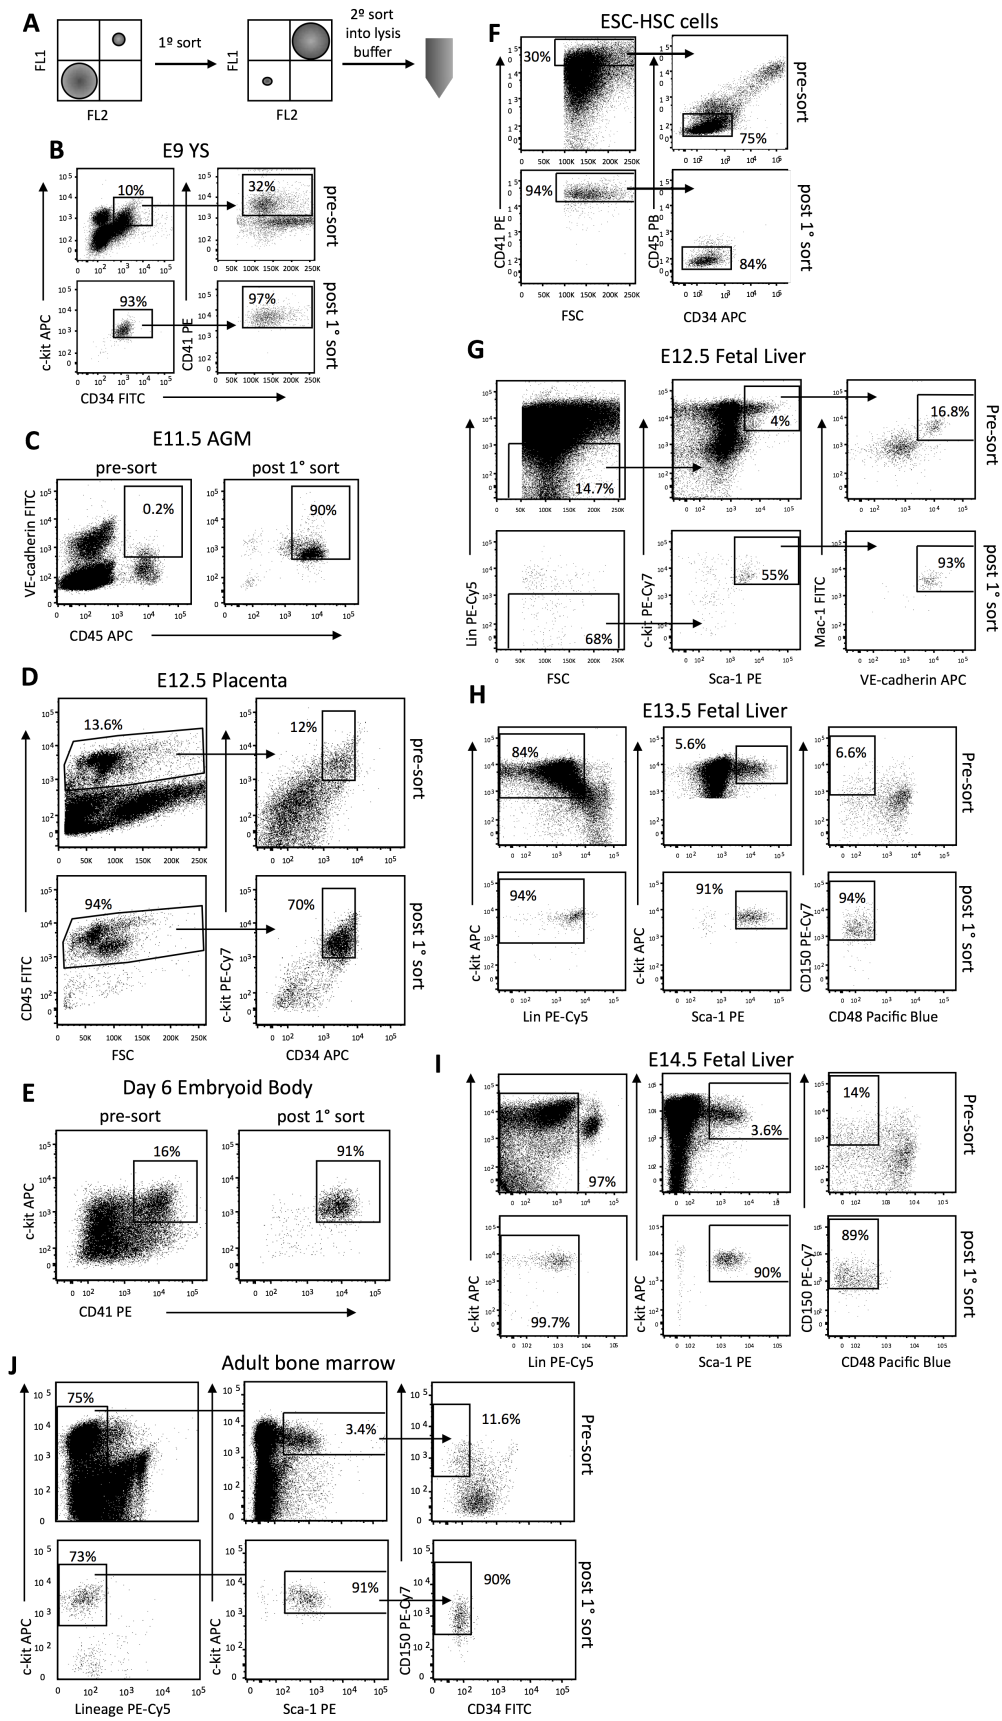

### **Supplemental Figure 1. Isolation of cell populations by FACS**

(A) To isolate specific cell populations for array or Fluidigm, cells were first sorted into PBS from their respective tissues and then sorted a second time directly into lysis buffer. The following are representative analyses of the isolation of the indicated cell populations after their initial collection into PBS but prior to their final sort into lysis buffer: (B) CD41<sup>+</sup>c-kit<sup>+</sup>CD34<sup>+</sup> E9 YS, (C) CD45<sup>+</sup>VE-cadherin<sup>+</sup> E11.5 AGM, (D) CD45<sup>+</sup>c-kit<sup>+</sup>CD34<sup>med</sup> E12.5 placenta, (E) c-kit<sup>+</sup>CD41<sup>+</sup> EBs, (F) CD41<sup>bright</sup>CD45<sup>-</sup>CD34<sup>-</sup> EPOCH cells, (G) Lin<sup>-</sup>Sca-1<sup>+</sup>c-kit<sup>+</sup>VE-cadherin<sup>+</sup>Mac-1<sup>low</sup> E12.5 FL, (H) Lin<sup>-</sup>Sca-1<sup>+</sup>c-kit<sup>+</sup>CD150<sup>+</sup>CD48<sup>-</sup> E13.5 FL, (I) Lin<sup>-</sup>Sca-1<sup>+</sup>c-kit<sup>+</sup>CD150<sup>+</sup>CD48<sup>-</sup> E14.5 FL, and (J) Lin<sup>-</sup>Sca-1<sup>+</sup>c-kit<sup>+</sup>CD150<sup>+</sup>CD34<sup>-</sup> adult WBM.

**Figure S2.**

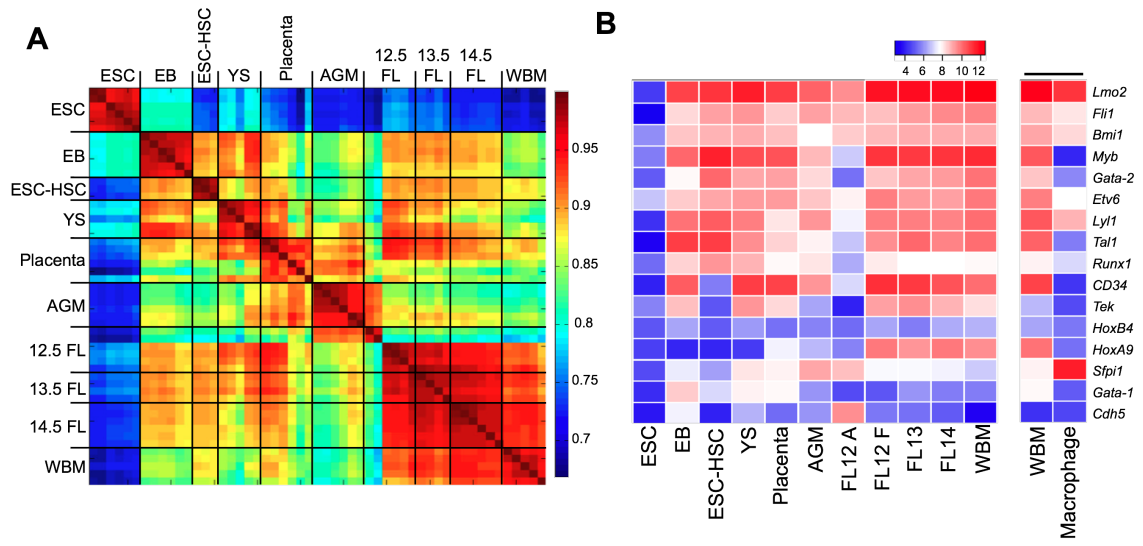

**Supplemental Figure 2. Pearson correlation and pathway enrichment analysis of pair-wise comparisons between each developmental hematopoietic population**

(A) Pearson correlation between all 53 gene expression profiles. Most samples are well correlated. The variability among E12.5 placenta samples was anticipated because the placental HSC phenotype is based on fewer markers than other HSC populations, and thus less defined (Gekas et al., 2005). (B) Examination of the expression pattern of known HSC regulators. *Sfp1* (*PU.1*), critical for definitive hematopoiesis (Scott et al., 1994), was present in YS and placenta, highest in AGM and E12.5 FL F, and lower thereafter. Expression of the erythroid factor *Gata-1* (Pevny et al., 1991) was high in E9 YS and E12.5 placenta, but low at the FL stage. *Hoxa9* was markedly up-regulated as development progressed: low in the YS, placenta and AGM stage, and high from the FL stage onward, a pattern highlighting the importance of *Hoxa9* as a regulator of definitive HSC (Lawrence et al., 1997). Other known regulators either did not vary dramatically during ontogeny (e.g. *Hoxb4*, *Runx1*, *Fli1*) or were consistently expressed during early development and only slightly up-regulated after the FL stage (*Lmo2*, *Bmi1*, *Myb*, *Gata-2*, *Etv6*, *Lyl1*, *Tal1*, *Cd34*, *Tek*). These genes are thus characteristic of the global transcriptional identity of primitive hematopoietic populations but cannot account for the developmental transitions that occur as HSC mature during ontogeny.

Figure S3.

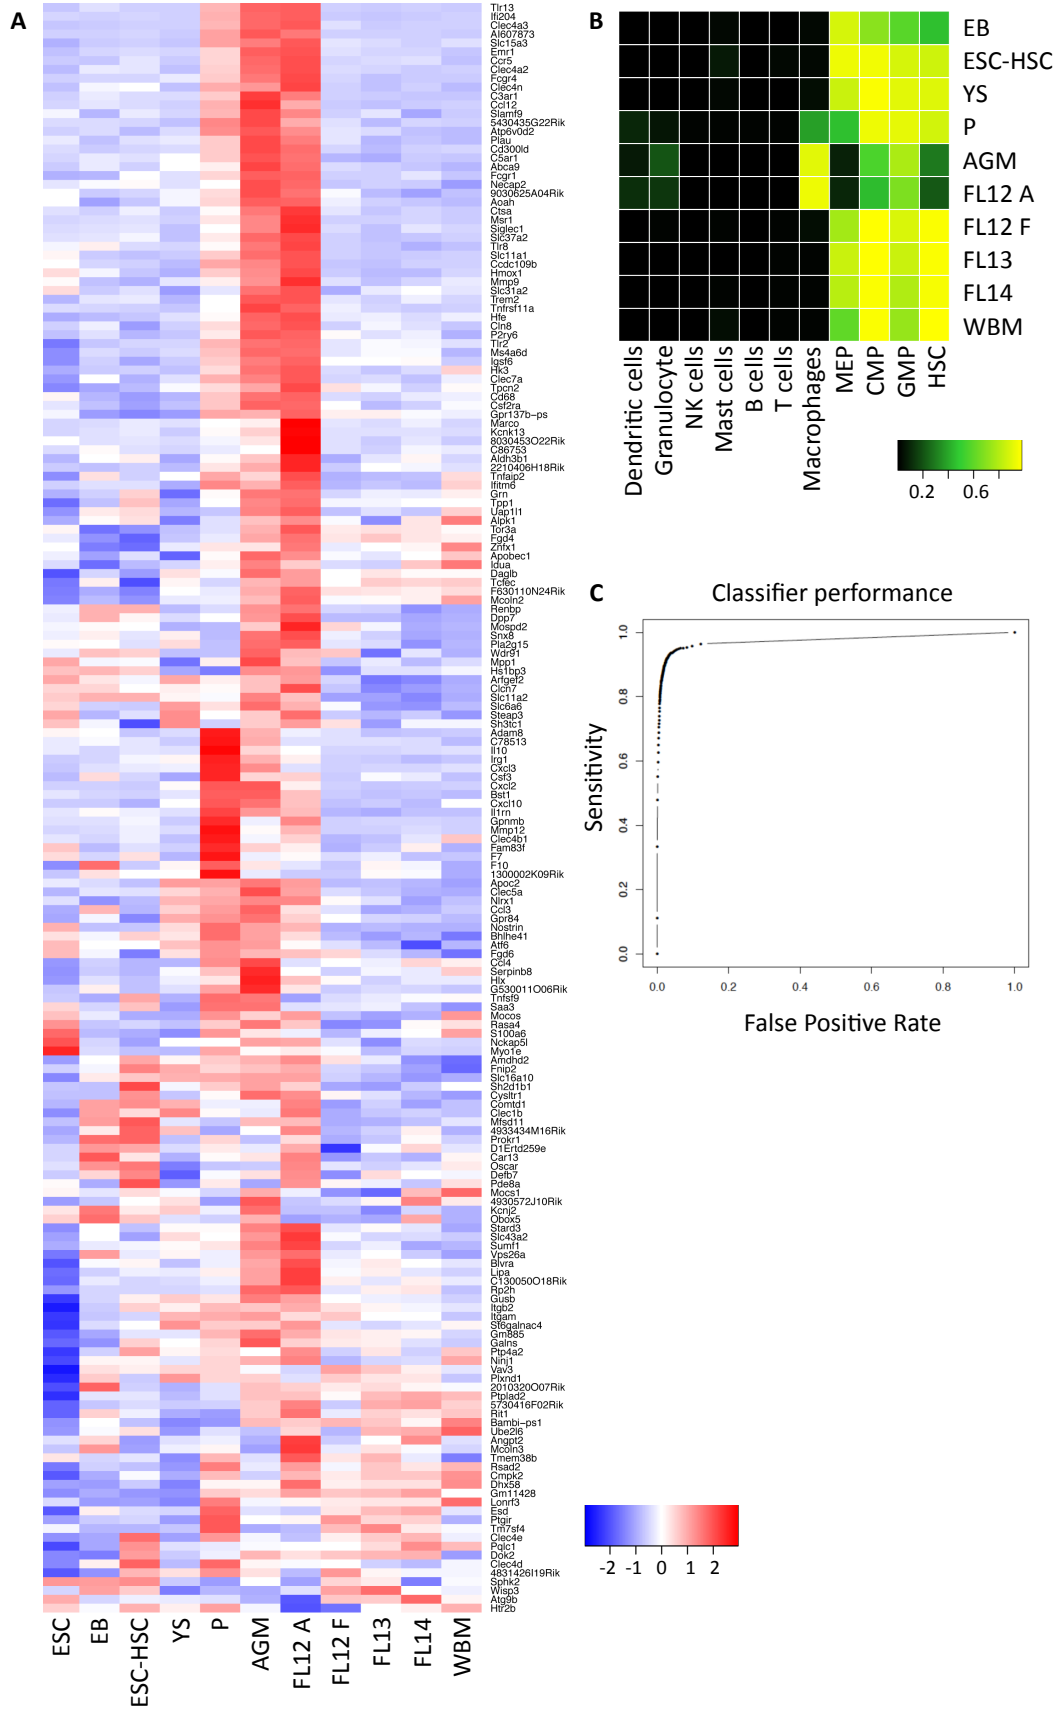

### **Supplemental Figure 3. Macrophage gene set expression across samples and hematopoietic-trained cell type classifier**

(A) Gene expression heatmap of the gene set whose expression is required to achieve a macrophage classification. (B) To ensure that the classification results were not biased due to incorporation of diverse cell types and tissues, a classifier was trained *de novo* using only hematopoietic populations. As in Figure 3A, each row is a biological group (*i.e.* WBM HSCs), and each column is a known tissue or cell type, in this case, only hematopoietic cell types. The classifier determines the posterior probability that a sample is indistinguishable from each of the tissues or cell types in the reference data set. Higher probabilities are bright yellow and low probabilities are dark green and black. (C) Receiver operating curve displaying the performance of the Naïve Bayesian classifier as determined by applying the algorithm to 1300 gene expression profiles of known origin. The false positive rate, defined as the number of incorrect classifications divided by the total number of classifications, is shown on the x-axis. The sensitivity, defined as the total number of correct classifications divided by the number of samples, is shown on the y-axis. Each point represents the sensitivity and false positive rate at a given probability cutoff.

Figure 4S

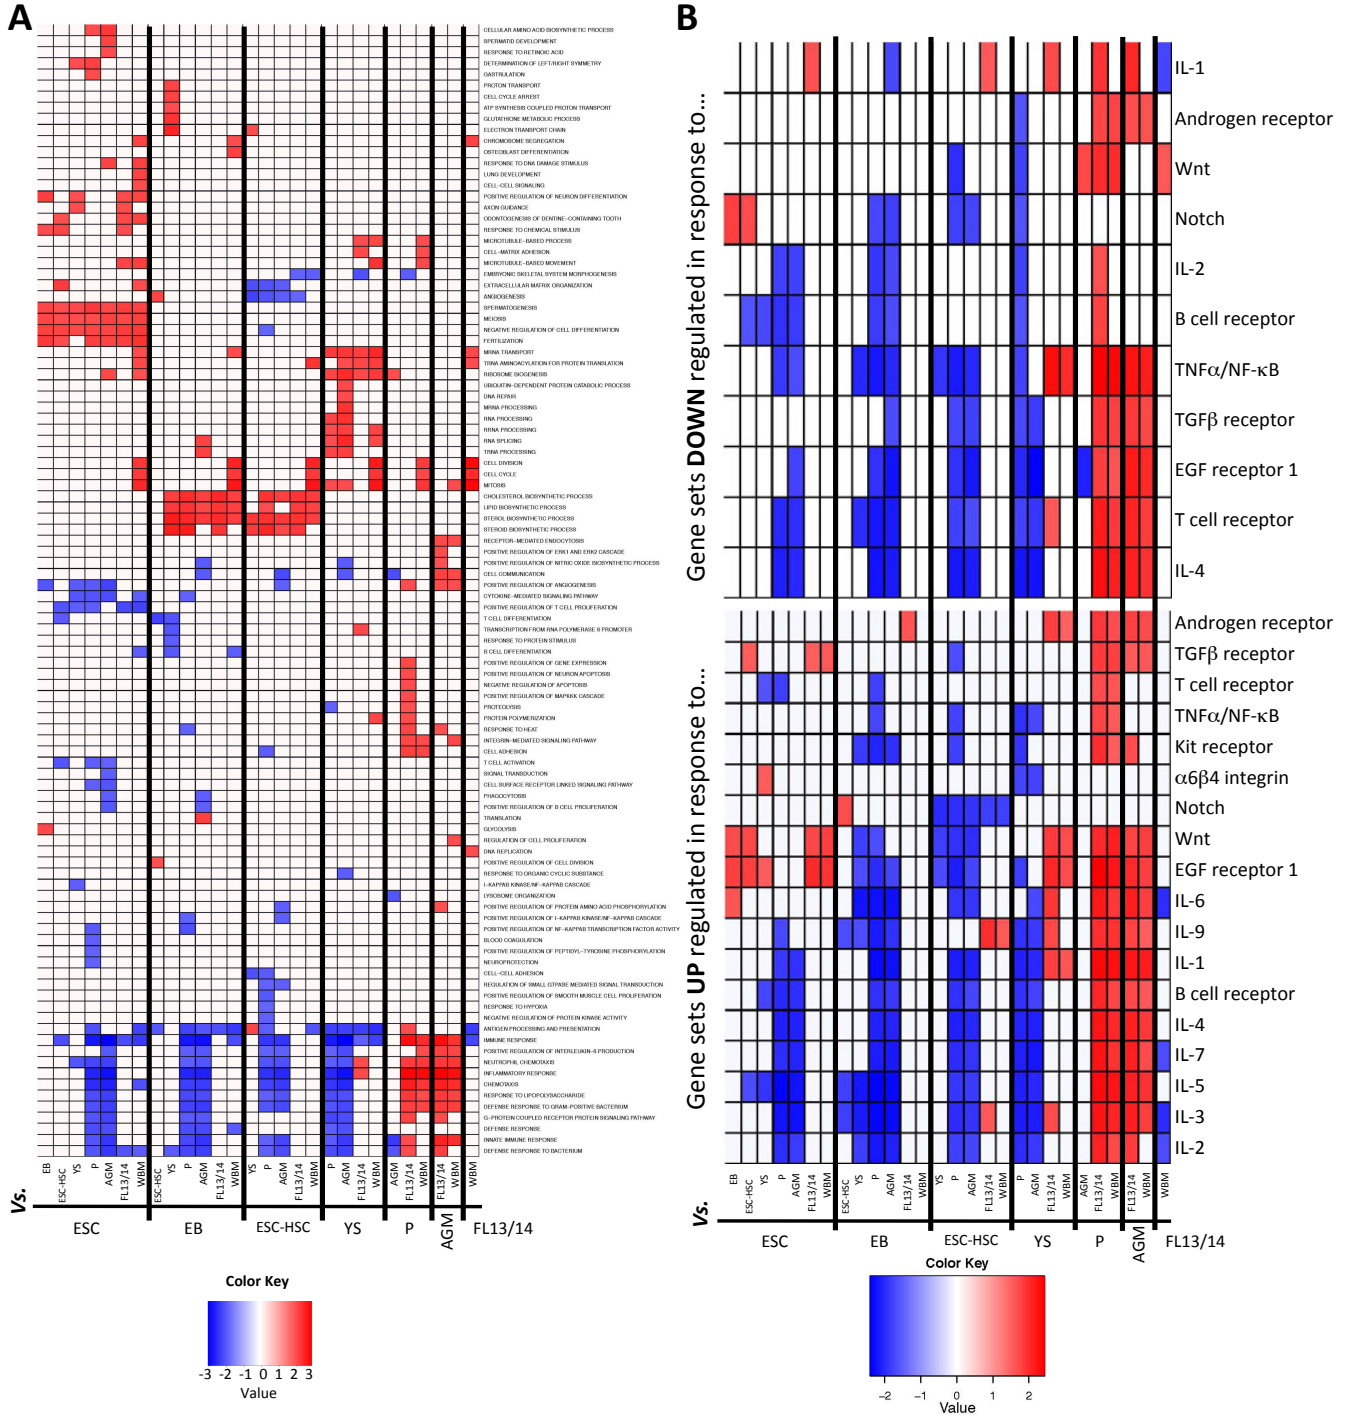



**Supplemental Figure 4. GSEA and Pathway Enrichment Analysis of Populations**

(A) GSEA pathway enrichment analysis of pair-wise comparisons to find GO Biological Processes enriched or depleted between developmental populations. (B) NetPath analysis of pair-wise comparisons to identify signaling pathway-specific transcriptional responses activated or suppressed in each population.

**Figure S5.**

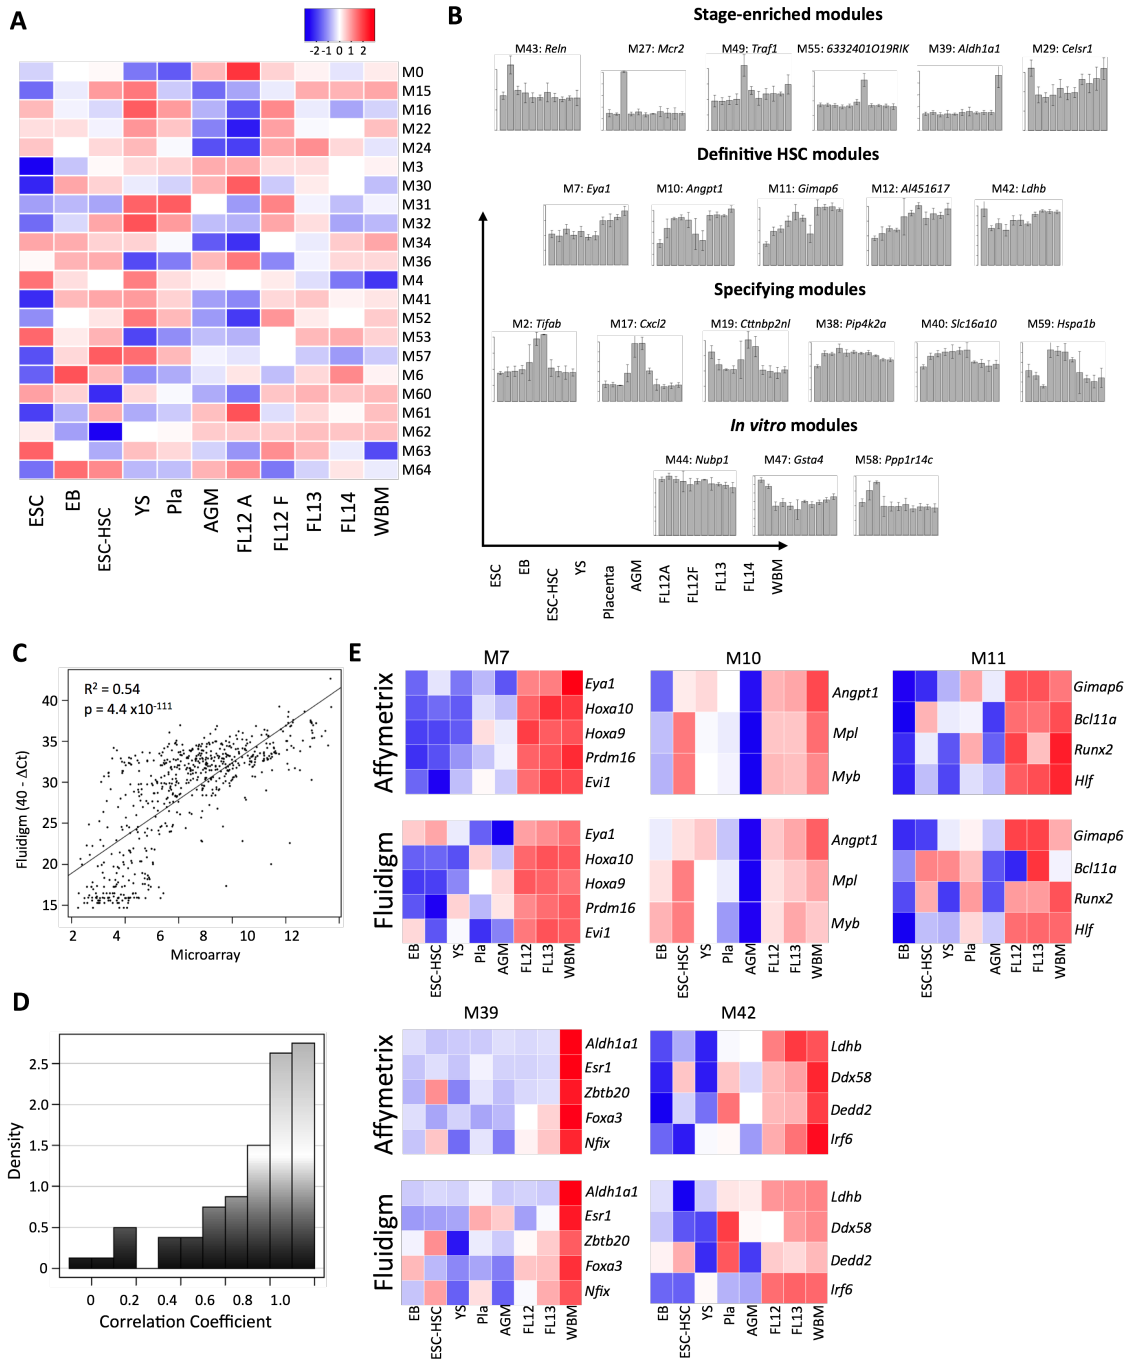

**Supplemental Figure 5. Identification of stage-specific gene sets and Fluidigm validation**

(A) Presentation of 22 WGCNA-determined co-regulated modules of genes that were not assigned as “stage enriched”, “definitive HSC”, “YS-like”, “specifying”, or “*in vitro*”. (B) The expression pattern across the dataset of the exemplars for stage-enriched modules (M43, M27, M49, M55, M39, and M29), select definitive HSC modules (M7, M10, M11, M12, M42), select specifying modules (M2, M17, M19, M38, M40, and M59), and in vitro modules (M44, M47, M58). (C) Results via gene array were highly correlated with results via Fluidigm analysis. (D) The majority of samples validated via Fluidigm showed an  $R^2$  value of greater than 0.7. (E) Representative analysis of genes from five modules showing that the pattern of expression seen across development via array is preserved when independent samples of the same populations are examined via Fluidigm.

Figure S6.

A

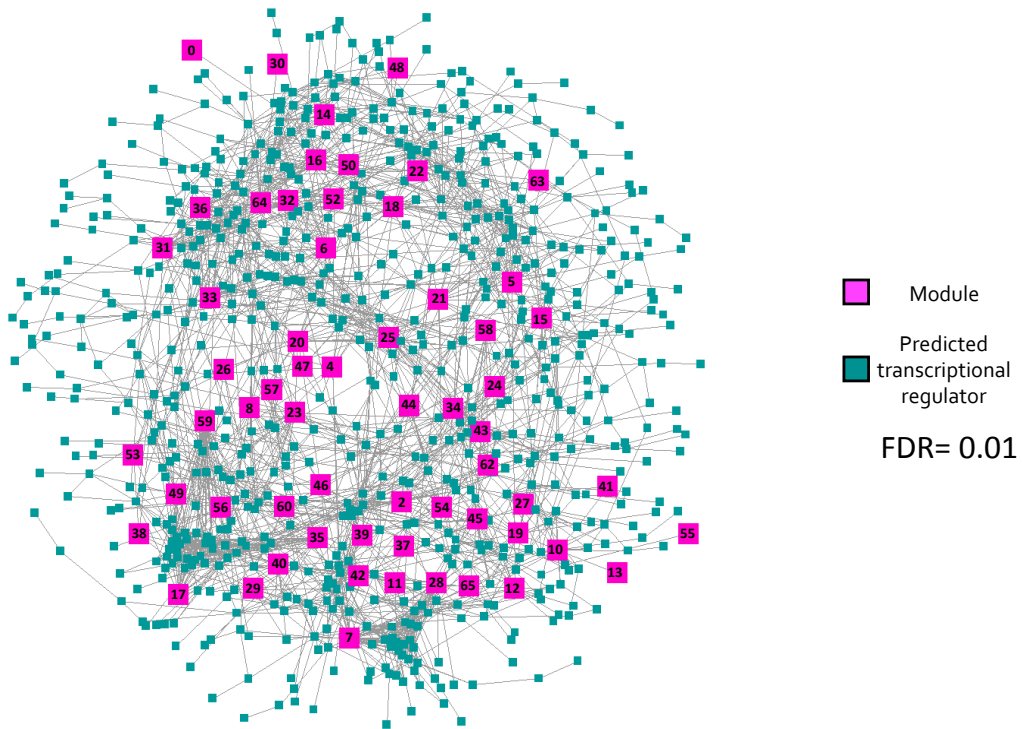

B

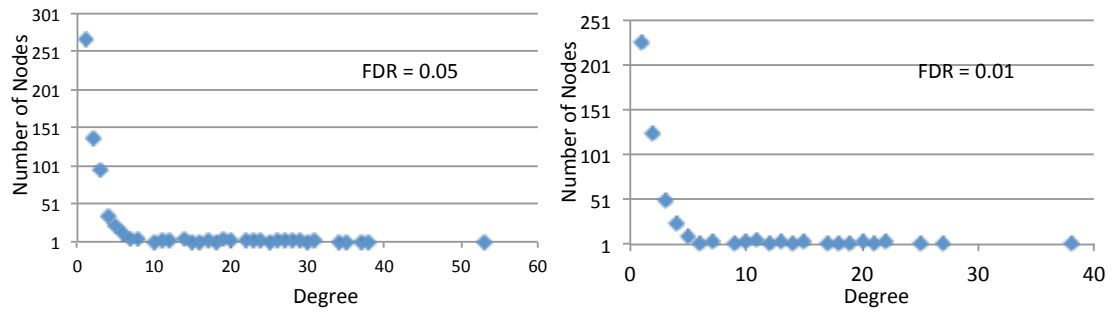

**Supplemental Figure 6: The transcriptional regulatory network of HSCs in development.** (A) The CLR (Context Likelihood of Relatedness) algorithm was applied to each WGCNA-derived gene module to identify putative transcriptional regulators for each gene set. The resulting predictions at the 0.01 FDR are presented as a network. Pink squares represent modules and blue squares represent predicted regulators. (B) The topology of the developing HSC gene regulatory network is scale-free. Histograms illustrating the node degree for the CLR network at FDR thresholds  $<0.05$  (top) and  $<0.01$  (bottom). Node degree indicates the number of edges or putative regulatory relationships connected to each node. Most nodes have fewer than five edges.

**Figure S7.**

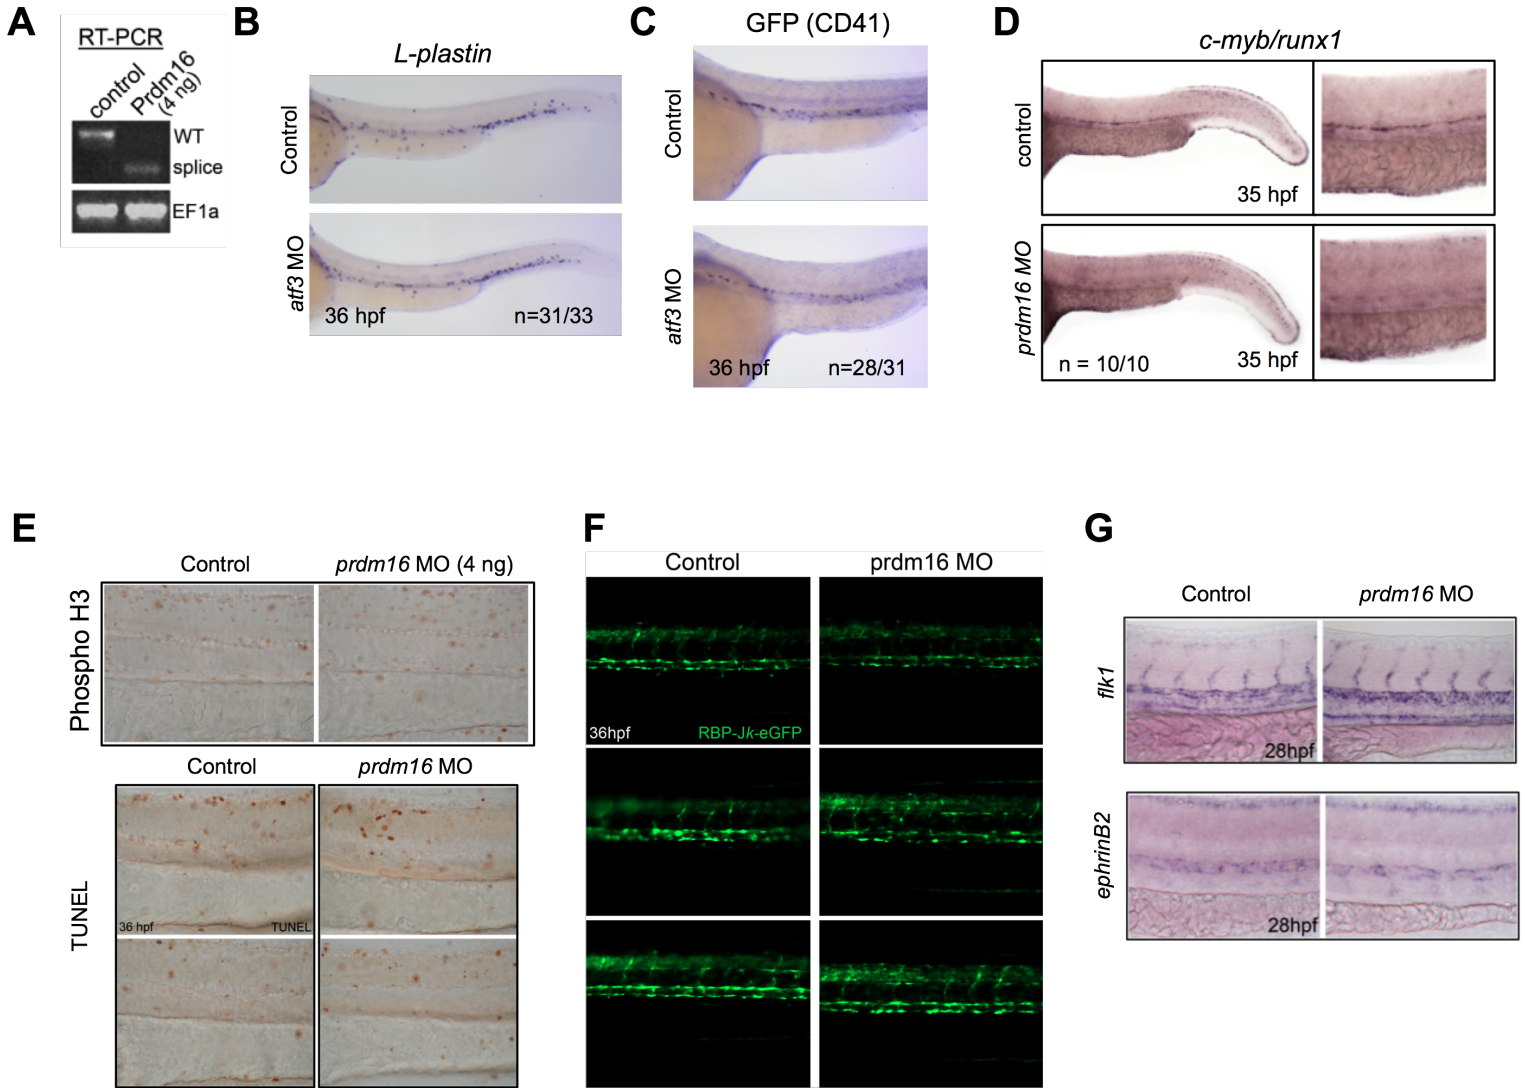

**Supplemental Figure 7. Functional validation of select gene candidates implicated in definitive HSC regulation.**

(A) RT-PCR for *prdm16* verify the splicing activity of the *prdm16*-MO. Wild-type product is 350bp, and the splicing out of exon 4 by the *prdm16*-MO results in a smaller 200bp product. (B) Whole mount *in situ* hybridization for *I-plastin* was performed on 36 hpf wild-type embryos that were either not injected or injected with *atf3*-MO. (C) Whole mount *in situ* hybridization for GFP was performed 36 hpf on embryos carrying a CD41-GFP transgene that were either not injected or injected with *atf3*-MO (Lin et al., 2005). (D) Whole-mount *in situ* hybridization was performed on 35 hpf wild-type embryos that were either not injected or injected with an independent *prdm16*-MO. (C) Phospho-histone H3 and TUNEL staining show no difference in mitosis or apoptosis, respectively, in *prdm16* morphants at 36hpf (n=4 control, n=4 morphants). (D) Knockdown of *prdm16* did not affect Notch signaling. The average GFP fluorescence between wild-type uninjected and *prdm16*-MO injected Notch reporter embryos were similar (n=5 control, n=5 morphants). (E) Whole-mount *in situ* hybridization of embryos 28 hpf either injected or not injected with *prdm16*-MO for *Flk1* and *ephrinB2*. (F) Whole-mount *in situ* hybridization of embryos at the 16 somite stage either injected or not injected with *prdm16*-MO for *b-globin e3*.

Supplementary Table 1.

| Annotation    |        |           | Microarray data |         |         |         |       |        |          |                |          | Fluidigm           |            |  |  |
|---------------|--------|-----------|-----------------|---------|---------|---------|-------|--------|----------|----------------|----------|--------------------|------------|--|--|
| Symbol        | Module | Type      | Correlation     | Z.score | Minimum | Maximum | Mean  | Median | Variance | TaqMan.ID      | p-value  | MA/Flu Correlation | Efficiency |  |  |
| rps29         | NA     | control   | NA              | NA      | NA      | NA      | NA    | NA     | NA       | Mm0232448_gH*  | NA       | NA                 | 0.944      |  |  |
| angpt1        | ME10   | exemplar  | 0.97            | 0       | 3.43    | 10.64   | 7.64  | 8.49   | 4.31     | Mm00456503_m1* | 1.07E-03 | -0.923             | 1.128      |  |  |
| erg           | ME10   | Regulator | 0.95            | 6.62    | 4.59    | 10.1    | 8.12  | 8.56   | 2.63     | Mm00504897_m1  | 5.32E-01 | 0.261              | -1         |  |  |
| mpl           | ME10   | Regulator | 0.91            | 5.64    | 4.68    | 10.34   | 8.24  | 8.68   | 2.74     | Mm00440310_m1* | 3.69E-04 | -0.946             | 1.011      |  |  |
| myb           | ME10   | Regulator | 0.92            | 5.57    | 4.74    | 11.68   | 9.89  | 10.77  | 3.54     | Mm00501741_m1* | 5.10E-03 | -0.869             | 1.223      |  |  |
| gimap6        | ME11   | exemplar  | 0.93            | 0       | 3.5     | 11      | 7.9   | 8.43   | 4.82     | Mm00462641_m1* | 1.07E-04 | -0.965             | 0.815      |  |  |
| bcl11a        | ME11   | Regulator | 0.93            | 5.73    | 4.23    | 9.18    | 7.07  | 7.43   | 2.28     | Mm00479358_m1* | 3.91E-01 | -0.353             | 1.139      |  |  |
| hif           | ME11   | Regulator | 0.87            | 5.34    | 3.97    | 11.22   | 7.53  | 7.14   | 6.04     | Mm00723157_m1* | 9.32E-04 | -0.927             | 0.756      |  |  |
| runx2         | ME11   | Regulator | 0.82            | 5.41    | 3.7     | 8.26    | 5.65  | 5.69   | 1.44     | Mm00501584_m1* | 7.13E-04 | -0.933             | 1.003      |  |  |
| ai451617      | ME12   | exemplar  | 0.97            | 0       | 3.43    | 8.44    | 6     | 6.42   | 2.15     | Mm01162558_m1* | 1.85E-03 | -0.907             | 1.149      |  |  |
| irf9          | ME12   | Regulator | 0.93            | 7.42    | 4.71    | 9.1     | 7.4   | 7.75   | 1.25     | Mm00492673_m1  | 4.44E-03 | -0.875             | 0.98       |  |  |
| nmi           | ME12   | Regulator | 0.89            | 5.72    | 5.15    | 10.4    | 8.47  | 9.08   | 2.14     | Mm00803857_m1* | 6.91E-03 | -0.854             | 1.092      |  |  |
| osgin1        | ME12   | Regulator | 0.89            | 6.13    | 4.27    | 8.09    | 6.71  | 7.17   | 1.11     | Mm00660947_m1* | 7.67E-03 | -0.849             | 0.805      |  |  |
| cxcl2         | ME17   | exemplar  | 0.95            | 0       | 2.69    | 13.5    | 5.52  | 3.48   | 12.44    | Mm00436450_m1* | 3.33E-04 | -0.948             | 0.965      |  |  |
| fosl2         | ME17   | Regulator | 0.84            | 7.21    | 5.29    | 9.2     | 6.64  | 6.41   | 0.84     | Mm00484442_m1* | 2.05E-02 | -0.787             | 1.029      |  |  |
| nr4a3         | ME17   | Regulator | 0.91            | 7.52    | 3.83    | 6.91    | 4.54  | 4.28   | 0.44     | Mm00450074_m1* | 4.25E-03 | -0.877             | 1.157      |  |  |
| rell          | ME17   | Regulator | 0.89            | 7.71    | 3.68    | 9.06    | 5.98  | 5.73   | 1.73     | Mm01239661_m1* | 3.37E-02 | -0.746             | 0.912      |  |  |
| cttnbp2nl     | ME19   | exemplar  | 0.96            | 0       | 3.25    | 8.69    | 5.14  | 4.4    | 2.3      | Mm00518765_m1* | 1.46E-02 | -0.811             | 0.777      |  |  |
| rps6ka4       | ME19   | Regulator | 0.78            | 6.05    | 3.83    | 7.17    | 5.25  | 5.17   | 0.67     | Mm00451280_m1* | 9.27E-03 | -0.839             | 1.324      |  |  |
| tcf3          | ME19   | Regulator | 0.87            | 5.56    | 5.4     | 10.55   | 8.32  | 7.94   | 0.32     | Mm01341186_m1* | 1.51E-02 | -0.808             | 1.024      |  |  |
| wwp1          | ME19   | Regulator | 0.86            | 5.4     | 5.98    | 8.51    | 7.07  | 6.98   | 0.34     | Mm01210682_m1* | 2.23E-02 | -0.78              | 1.073      |  |  |
| tifab         | ME2    | exemplar  | 0.97            | 0       | 3.17    | 8.32    | 4.48  | 3.89   | 2.49     | Mm04210261_m1* | 1.25E-01 | -0.588             | 1.012      |  |  |
| ifl204        | ME2    | Regulator | 0.91            | 6.33    | 2.21    | 9.58    | 3.8   | 2.66   | 5.35     | Mm00492602_m1* | 1.59E-03 | -0.912             | 0.976      |  |  |
| irf8          | ME2    | Regulator | 0.86            | 6.15    | 3.42    | 9.78    | 6.52  | 6.3    | 3.03     | Mm01250091_m1  | 1.22E-02 | -0.823             | 0.966      |  |  |
| maf           | ME2    | Regulator | 0.92            | 6.18    | 3.18    | 9       | 5     | 4.31   | 2.97     | Mm02581355_s1* | 3.32E-02 | -0.747             | 0.595      |  |  |
| mc2r          | ME27   | exemplar  | 0.97            | 0       | 2.22    | 10.16   | 3.32  | 2.87   | 2.9      | Mm01262510_m1* | 1.61E-06 | -0.991             | 1.021      |  |  |
| dp3           | ME27   | Regulator | 0.67            | 4.96    | 4.34    | 6.03    | 4.91  | 4.82   | 0.13     | Mm00475440_m1* | 2.75E-03 | -0.894             | 0.871      |  |  |
| mbd2          | ME27   | Regulator | 0.55            | 3.32    | 8.12    | 10.41   | 9.15  | 9.16   | 0.26     | Mm00521967_m1* | 1.64E-01 | -0.544             | 1.05       |  |  |
| tcf4          | ME27   | Regulator | 0.53            | 4.03    | 5.56    | 8.81    | 7.37  | 7.43   | 0.38     | Mm00443210_m1* | 3.93E-01 | -0.351             | 0.958      |  |  |
| ce1sr1        | ME29   | exemplar  | 0.93            | 0       | 2.85    | 7.16    | 4.74  | 4.42   | 1.33     | Mm00464808_m1* | 3.55E-02 | -0.741             | 0.977      |  |  |
| b930041f14nk  | ME29   | Regulator | 0.84            | 6.83    | 4.21    | 7.5     | 5.88  | 5.8    | 0.74     | Mm00844649_s1* | 5.23E-02 | -0.702             | 0.751      |  |  |
| kif12         | ME29   | Regulator | 0.84            | 6.12    | 3.17    | 5.47    | 4.2   | 4.12   | 0.32     | Mm00516098_m1* | 1.79E-02 | -0.797             | 1.033      |  |  |
| pml           | ME29   | Regulator | 0.87            | 5.43    | 5.32    | 8.76    | 6.57  | 6.35   | 0.77     | Mm00476969_m1* | 6.83E-01 | -0.173             | 1.146      |  |  |
| evi2a         | ME3    | exemplar  | 0.98            | 0       | 2.61    | 8.07    | 6.54  | 6.84   | 2.02     | Mm03030107_s1* | 5.80E-02 | -0.69              | 1.124      |  |  |
| hcls1         | ME3    | Regulator | 0.97            | 4.39    | 2.46    | 9.11    | 7.21  | 7.83   | 3.27     | Mm00468258_m1* | 7.45E-01 | 0.138              | 0.196      |  |  |
| ifnar2        | ME3    | Regulator | 0.95            | 4.23    | 4.87    | 9.9     | 8.12  | 8.35   | 1.67     | Mm00494916_m1* | 1.89E-01 | -0.517             | 0.917      |  |  |
| tal1          | ME3    | Regulator | 0.67            | 3.95    | 2.75    | 11.23   | 8.79  | 9.57   | 4.88     | Mm01187033_m1* | 1.36E-01 | -0.574             | 0.983      |  |  |
| pip4k2a       | ME38   | exemplar  | 0.94            | 0       | 5.71    | 9.51    | 7.78  | 8.11   | 0.77     | Mm00493572_m1* | 6.46E-01 | -0.194             | 0.56       |  |  |
| foxn2         | ME38   | Regulator | 0.78            | 4.74    | 5.48    | 8.32    | 6.91  | 6.83   | 0.49     | Mm00839106_g1  | 8.00E-01 | -0.108             | 0.882      |  |  |
| zdhhc16       | ME38   | Regulator | 0.75            | 4.26    | 7.62    | 9.12    | 8.52  | 8.57   | 0.13     | Mm00470108_m1* | 7.98E-02 | -0.652             | 1.085      |  |  |
| zdhhc21       | ME38   | Regulator | 0.78            | 4.39    | 6.3     | 8.8     | 7.54  | 7.64   | 0.35     | Mm00509795_m1* | 4.40E-02 | -0.72              | 0.751      |  |  |
| aldh1a1       | ME39   | exemplar  | 0.96            | 0       | 2.5     | 10.55   | 3.51  | 2.91   | 3.71     | Mm00657317_m1* | 2.98E-06 | -0.989             | 0.894      |  |  |
| esr1          | ME39   | Regulator | 0.95            | 7.94    | 2.71    | 7.13    | 3.4   | 3.1    | 0.99     | Mm00433149_m1* | 6.72E-03 | -0.856             | 0.976      |  |  |
| foxa3         | ME39   | Regulator | 0.88            | 6.5     | 3.25    | 7.85    | 4.55  | 4.31   | 1.26     | Mm00487714_m1* | 4.91E-03 | -0.871             | 1.049      |  |  |
| nfx           | ME39   | Regulator | 0.76            | 5.31    | 4.35    | 8.42    | 6.23  | 6.18   | 1.11     | Mm00477796_m1* | 2.41E-04 | -0.554             | 0.997      |  |  |
| zbb20         | ME39   | Regulator | 0.88            | 6.51    | 3.72    | 7.13    | 4.75  | 4.57   | 0.57     | Mm00457765_m1* | 1.06E-02 | -0.831             | 1.186      |  |  |
| sic16a10      | ME40   | exemplar  | 0.91            | 0       | 4.24    | 7.37    | 5.88  | 5.95   | 0.85     | Mm00661045_m1* | 5.43E-03 | -0.866             | 0.902      |  |  |
| cebpa         | ME40   | Regulator | 0.87            | 6.76    | 3.36    | 9.56    | 6.35  | 6.17   | 2.95     | Mm00514283_s1* | 1.75E-01 | -0.532             | 1.218      |  |  |
| kif7          | ME40   | Regulator | 0.83            | 6.29    | 5.04    | 8.61    | 6.69  | 6.57   | 0.98     | Mm00728361_s1* | 5.08E-01 | -0.276             | 2.144      |  |  |
| zbb16         | ME40   | Regulator | 0.72            | 4.71    | 4.23    | 7.56    | 5.83  | 5.64   | 1.22     | Mm01176868_m1* | 3.66E-02 | -0.738             | 1.04       |  |  |
| ldhb          | ME42   | exemplar  | 0.93            | 0       | 6.53    | 12.67   | 9.52  | 9.82   | 2.36     | Mm00493146_m1* | 3.19E-02 | -0.649             | 1.14       |  |  |
| ddx58         | ME42   | Regulator | 0.81            | 6.05    | 3.95    | 7.29    | 5.75  | 5.86   | 0.6      | Mm00554529_m1* | 1.05E-01 | -0.615             | 1.197      |  |  |
| dadd2         | ME42   | Regulator | 0.7             | 5.76    | 5.14    | 7.47    | 6.57  | 6.6    | 0.38     | Mm01149726_m1* | 2.69E-01 | -0.445             | 1.094      |  |  |
| irf6          | ME42   | Regulator | 0.76            | 5.53    | 2.75    | 8.71    | 5.86  | 6.13   | 2.6      | Mm00516797_m1* | 1.43E-03 | -0.915             | 0.449      |  |  |
| reln          | ME43   | exemplar  | 0.96            | 0       | 2.85    | 7.36    | 3.69  | 3.28   | 1.12     | Mm00465200_m1* | 2.27E-06 | -0.99              | 0.812      |  |  |
| hoxd1         | ME43   | Regulator | 0.95            | 8.64    | 2.06    | 7.19    | 3.03  | 2.56   | 1.87     | Mm00439370_g1* | 1.44E-04 | -0.961             | 0.945      |  |  |
| hoxd8         | ME43   | Regulator | 0.91            | 7.49    | 3.27    | 7.85    | 4.3   | 3.87   | 1.23     | Mm03016337_m1* | 3.33E-03 | -0.887             | 0.803      |  |  |
| kif1          | ME43   | Regulator | 0.78            | 5.74    | 4.16    | 10.29   | 6.45  | 6.23   | 1.99     | Mm00516096_m1* | 4.52E-02 | -0.717             | 0.86       |  |  |
| nubp1         | ME44   | exemplar  | 0.92            | 0       | 6.35    | 8.66    | 7.51  | 7.49   | 0.33     | Mm00478752_m1* | 4.22E-01 | -0.332             | 1.134      |  |  |
| gt2f2         | ME44   | Regulator | 0.83            | 6.08    | 7.83    | 10.64   | 9.17  | 9.1    | 0.49     | Mm01310683_m1* | 2.19E-01 | -0.489             | 0.775      |  |  |
| psmc3         | ME44   | Regulator | 0.83            | 6.28    | 9.71    | 11.45   | 10.89 | 10.95  | 0.12     | Mm00477177_m1* | 9.60E-01 | -0.021             | 1.063      |  |  |
| rnf141        | ME44   | Regulator | 0.75            | 5.39    | 6.09    | 8.06    | 6.95  | 6.84   | 0.28     | Mm01130671_g1* | 6.37E-01 | -0.199             | 0.949      |  |  |
| gst4          | ME47   | exemplar  | 0.95            | 0       | 4.68    | 13.41   | 8.61  | 8      | 5.15     | Mm00494803_m1* | 1.20E-02 | -0.823             | 0.778      |  |  |
| bc003267      | ME47   | Regulator | 0.8             | 5.32    | 3.96    | 8.03    | 6.34  | 6.38   | 0.92     | Mm00728712_s1* | 6.91E-01 | -0.168             | 0.758      |  |  |
| gt2h3         | ME47   | Regulator | 0.8             | 4.73    | 5.97    | 9.01    | 7.8   | 7.88   | 0.47     | Mm00619444_m1* | 5.06E-03 | -0.869             | 1.03       |  |  |
| uba3          | ME47   | Regulator | 0.8             | 3.97    | 8.25    | 10.77   | 9.42  | 9.41   | 0.32     | Mm00495866_m1* | 1.78E-02 | -0.797             | 1.136      |  |  |
| traf1         | ME49   | exemplar  | 0.93            | 0       | 3.39    | 9.38    | 4.96  | 4.61   | 2.12     | Mm00493827_m1* | 7.84E-03 | -0.848             | 1.579      |  |  |
| foxa1         | ME49   | Regulator | 0.62            | 6.83    | 2.7     | 5.85    | 3.39  | 3.16   | 0.47     | Mm00484713_m1* | 6.27E-02 | -0.681             | 0.18       |  |  |
| irf4          | ME49   | Regulator | 0.8             | 6.5     | 3.54    | 6.28    | 4.32  | 4.09   | 0.4      | Mm00516431_m1* | 3.25E-02 | -0.749             | 1.009      |  |  |
| mxd1          | ME49   | Regulator | 0.9             | 7.19    | 5.64    | 9.08    | 6.73  | 6.6    | 0.6      | Mm00487504_m1* | 4.89E-03 | -0.871             | 1.176      |  |  |
| 6332401o19rik | ME55   | exemplar  | 0.97            | 0       | 2.97    | 7.16    | 3.53  | 3.39   | 0.49     | Mm00844775_s1* | 8.74E-01 | 0.067              | 1.25       |  |  |
| maf           | ME55   | Regulator | 0.78            | 4.27    | 3.96    | 8.72    | 4.9   | 4.42   | 1.34     | Mm00627481_s1* | 1.40E-01 | -0.57              | 0.976      |  |  |
| nr1h3         | ME55   | Regulator | 0.91            | 4.88    | 4.7     | 10.65   | 5.75  | 5.46   | 1.29     | Mm00443451_m1* | 7.87E-02 | -0.654             | 0.802      |  |  |
| spic          | ME55   | Regulator | 0.76            | 3.7     | 3.13    | 10.55   | 4.5   | 3.94   | 2.76     | Mm00488428_m1* | 6.44E-05 | -0.97              | 1.203      |  |  |
| ppp1r14c      | ME58   | exemplar  | 0.94            | 0       | 2.9     | 7.3     | 4.35  | 3.86   | 1.13     | Mm00652462_m1  | 1.08E-01 | -0.611             | 0.821      |  |  |
| etv2          | ME58   | Regulator | 0.6             | 5.21    | 3.99    | 9.53    | 5.53  | 4.95   | 2.39     | Mm00468389_m1* | 9.21E-03 | -0.839             | 1.024      |  |  |
| hmgs1         | ME58   | Regulator | 0.81            | 7.43    | 3.06    | 7.02    | 4.41  | 4      | 0.98     | Mm00524111_m1  | 5.91E-03 | -0.862             | 0.937      |  |  |
| zfpm2         | ME58   | Regulator | 0.8             | 5.92    | 3.08    | 8.03    | 4.35  | 3.79   | 1.46     | Mm00496074_m1* | 5.57E-04 | -0.938             | 1.094      |  |  |
| hspa1b        | ME59   | exemplar  | 0.95            | 0       | 3.01    | 11.4    | 6.83  | 5.57   | 7.46     | Mm03038954_s1* | 2.31E-01 | -0.478             | 0.818      |  |  |
| egr3          | ME59   | Regulator | 0.92            | 8.68    | 4.06    | 8.27    | 5.65  | 4.92   | 1.8      | Mm00516979_m1* | 2.17E-03 | -0.902             | 0.822      |  |  |
| fosb          | ME59   | Regulator | 0.88            | 8.28    | 2.69    | 10.63   | 5.59  | 3.8    | 8.33     | Mm00500401_m1* | 2.15E-03 | -0.903             | 1.195      |  |  |
| kif6          | ME59   | Regulator | 0.93            | 8.67    | 5.91    | 10.9    | 8.12  | 7.5    | 2.32     | Mm00516184_m1* | 1.17E-03 | -0.921             | 1.235      |  |  |
| ampd3         | ME62   | exemplar  | 0.85            | 0       | 2.61    | 8.11    | 6.59  | 6.81   | 1.16     | Mm0047495_m1*  | 1.15E-03 | -0.921             | 1.156      |  |  |
| bach2         | ME62   | Regulator | 0.71            | 4.48    | 3.96    | 6.44    | 5.43  | 5.35   | 0.25     | Mm00464379_m1* | 2.72E-03 | -0.894             | 1.212      |  |  |
| fmln2         | ME62   | Regulator | 0.73            | 5.04    | 3.8     | 9.72    | 8.02  | 8.27   | 1.24     | Mm00549621_m1  | 6.20E-02 | -0.683             | 0.986      |  |  |
| ttatip2       | ME62   | Regulator | 0.68            | 4.69    | 4       | 7.38    | 5.5   | 5.58   | 0.6      | Mm00454746_m1* | 1.69E-03 | -0.91              | 0.826      |  |  |
| eya1          | ME7    | exemplar  | 0.97            | 0       | 3.42    | 7.63    | 4.97  | 4.44   | 1.52     | Mm00438796_m1* | 6.38E-02 | -0.679             | 1.212      |  |  |
| evl1          | ME7    | Regulator | 0.87            | 7.05    | 2.92    | 7.89    | 5.56  | 5.33   | 2.49     | Mm00514814_m1* | 4        |                    |            |  |  |



## Supplemental Methods

### *Antibodies used for cell sorting*

CD41 (MWreg-30), c-kit (2B8), CD34 (RAM34), CD45 (30-F11), VE-cadherin (11D4.1), ter119 (ter119), CD3(145-2C11), CD4 (GK1.5), CD8 (536.7), IgM (11/41), CD19 (1D3), Gr-1 (RB6-8C5), Mac-1 (M1/70), CD48 (HM48-1, Biolegend), CD150 (TC15-12F122, Biolegend), Sca-1 (E13-161.7), anti-rat PE-Cy5, anti-rat FITC, and anti-rat APC. Unless otherwise indicated, all antibodies were obtained from Ebiosciences.

### *Embryo dissections and cell preparations*

The Children's Hospital Boston institutional review board approved these studies. All embryonic tissues were dissected from C57Bl/6 mice and treated as previously described (McKinney-Freeman et al., 2009).

### *Embryoid body and EPOCH cell culture*

*iNotch* or *iCdx4* ESC were created, maintained, and differentiated into EBs or ESC-HSC cells as previously described (Kyba et al., 2002; McKinney-Freeman et al., 2009). For *iNotch* cells, ESC were differentiated as previously described with the addition of 0.5 µg/mL doxycycline between days4-day6 EB differentiation. At day 6, EB-derived cells were isolated, transduced with retroviral *HoxB4*, and expanded on OP9 stroma exactly as previously described for *iCdx4* ESC (McKinney-Freeman et al., 2009). ESC-HSC isolated from *iNotch* or *iCdx4* ESC were functionally, phenotypically, and transcriptionally indistinguishable (McKinney-Freeman S, data not shown).

### *Zebrafish maintenance and microinjection*

Zebrafish (*Danio rerio*) were maintained according to Animal Research guidelines at Children's Hospital Boston. Tübingen strain and the Notch reporter line *TP1bglob:gfp* (Parsons et al 2009) were used. Embryos were developed at 28.5°C and staged according to hpf and morphological features (Kimmel et al 1995). Morpholinos were injected at the 1-cell stage. Splice blocking morpholino targeting exon 4 of *prdm16* (5'-ACTCACACTATCACCCACCTTATCA-3' or 5'-ATGACTTGCATTAATCTCACCTTCC-3') and translation morpholino targeting *rxf5* (5'-CTGCCTTTAACTGATCTTCTGCCAT-3') were ordered from Gene-Tools and dissolved in water.

Protein sequence and genomic synteny revealed locus LOC100151531 as the most likely candidate for a zebrafish orthologue of the gene GFI1B. *Gfi1b* morpholino sequence targeting the intron-exon boundary of exon 5: 5'-GCTTCTTTCCTGTAAACACAAAACA-3'. Antisense splicing morpholino with sequence TGTTTATTTAACTTACCACCTCTGT targeting the exon2/intron2 boundary of *msrb2* was injected into 1-4 cell embryos and assayed at 36hpf for *runx1* and *c-myb* expression. Antisense splicing morpholino with sequence TGTAGTAATGGAGTGTTTACCCTGC targeting the exon4/intron4 boundary of *tulp4* was injected into 1-4 cell embryos and assayed at 36hpf for *runx1* and *c-myb* expression. Disrupted splicing was verified by RT-PCR with primers 5'-GTGGTGCTGGTGCGCTGGAACGAGCCCTTCC-3 and 5'-GGGTCGGAAGTCACGAGTCTCTCCATCCC-3. For *gfi1b*, *msrb2*, and *tulp4* morpholinos, 4 ng was injected. 0.5 ng of antisense splicing morpholino with sequence GGGACAGCCTGAAATAACAACATCT targeting the intron2/exon3 boundary of *atf3* was injected into 1-4 cell embryos and assayed at 36hpf for *runx1* and *c-myb* expression. Disrupted splicing was verified by RT-PCR with primers 5'-ATTTCCGGCATGATGCTTCAGCACCCCTGG-3 and 5'-TCTTCGGGGGTCTGGCCGTTCTGAGCG-3. Total RNA was extracted from embryos staged at 36hpf in 500  $\mu$ L as previously reported. Primers to amplify exons 3 to 5 of *prdm16* were as follows: forward 5'-AAGCAGGAGCGGGAAGACAG-3' and reverse 5'-TGTGCTTGTGCTGCTTGAGG-3' (Draper et al., 2001).

#### *Whole-mount in situ hybridization, phosphoH3, and TUNEL staining*

Whole-mount in situ hybridization in zebrafish embryos was performed as described previously (Thisse and Thisse, 2008). Stained embryos were mounted in glycerol and imaged on a Nikon E600 compound microscope with a Nikon Coolpix 4500 camera. Phospho-histone H3 staining was performed as described previously (Shepard et al 2005) with diaminobenzidine/H<sub>2</sub>O<sub>2</sub> (Invitrogen). TUNEL staining was performed on fixed embryos as described (Shepard et al., 2005). Equal number of control and morpholino injected embryos were imaged in the tail region above the yolk sac extension, and the images were used for counting the number of mitotic or apoptotic cells, averaging the results.

#### *Fluidigm*

The exemplar and top 3 CLR-predicted regulators for 22 modules were validated via qRT-PCR on the Fluidigm BioMark 96x96 platform (Fluidigm, San Francisco, CA, Supplemental Table 2). cDNA from 200 cells per sample was pre-amplified using the pool of TaqMan probes per the Fluidigm instructions. As a quality control for each assay, we performed a standard curve of six 10-fold dilutions of pre-amplified cDNA pooled from all samples. The 80 of 92 non-control assays with amplification efficiencies between 0.75 and 1.25 were considered reliable and assessed for correlation with the microarray data. Delta Cts were calculated in reference to the housekeeping gene *Rps29*. To determine whether a gene replicated the expression pattern observed in the microarray data, we calculated the correlation coefficient between the average of the deltaCts for each replicate of a biological group and the average gene value from the microarrays. We considered genes validated when the p-value of the correlation coefficient  $<0.10$ .

### *Microarray*

Raw microarray signal intensities were RMA-summarized and quantile normalized using R/BioConductor (Bolstad et al., 2003; Gentleman et al., 2004; Irizarry et al., 2003). To correct for batch effects, we applied the ComBat batch correction algorithm to the normalized data (Johnson et al., 2007), then multiple probesets mapping to the same gene were averaged, resulting in 21,308 gene expression measures per sample. The expression of all genes was used in the analyses displayed in Figure 2. We used hierarchical clustering with the 'average' linkage method for the dendrogram in Figure 2A. In subsequent analyses steps we used the 13,530 genes detected as expressed in at least one biological group. To find genes differentially expressed between biological groups, we performed pair-wise Student's T-tests, treating genes with nominal p-values  $<0.05$  and fold change  $>2$  as differentially expressed. Stage-specific and stage-enriched modules were identified as described in the Methods section. To find sets of positively correlated genes (modules), we used WGCNA, setting  $\beta=15$ . To find enrichment of Gene Ontology and NetPath gene sets, we applied Gene Set Enrichment Analysis to gene lists ranked by fold change for each specified comparison. All analysis results, including differentially expressed gene lists, genes in modules, and transcription factor regulators of modules, and raw data, are freely available through the companion website, <http://hsc.hms.harvard.edu/>. The Context likelihood of relatedness (CLR) algorithm uses mutual information to determine the statistical dependence between

transcription factor and putative target module expression. To compute mutual information, we used a B-spline smoothing and discretization method, implementing the Freedman-Diaconis rule to estimate the bin width size. All mutual information values were computed using 6 bins and third order B-splines and a MatLab interface to B-spline mutual information estimation code library is available at the companion website.

### *Naïve Bayesian classifier and context-dependent gene regulatory networks*

We trained a Naïve Bayesian classifier (Mitchell, 1997) using 130 gene expression profiles from three independent experiments representing 44 cell types and tissues (GSE10246, GSE14012, and GSE10806). The classifier uses Bayes' Theorem to compute the posterior probability that a query gene expression profile is indistinguishable from biological replicates of each of 44 distinct cell types and tissues that are in the training data set, given distributions of inter- and intra-cell type distances:  $\Pr(\text{que} = \text{Ref}_i \mid \text{Dist}_{q,i} = X) = \Pr(\text{Dist}_{q,i} = X \mid \text{que} = \text{Ref}_i) * \Pr(\text{que} = \text{Ref}_i) / (\Pr(\text{Dist}_{q,i} = X \mid \text{que} = \text{Ref}_i) + \Pr(\text{Dist}_{q,i} = X \mid \text{que} \neq \text{Ref}_i))$ ,

where que = query sample, Ref<sub>i</sub> = reference sample i, Dist<sub>q,i</sub> = distance between query and Ref<sub>i</sub> profiles. Assuming equivalent prior probabilities that a query is indistinguishable from each reference sample, this becomes:

$$\Pr(\text{que} = \text{Ref}_i \mid \text{Dist}_{q,i} = X) = \Pr(\text{Dist}_{q,i} = X \mid \text{que} = \text{Ref}_i) / (\Pr(\text{Dist}_{q,i} = X \mid \text{que} = \text{Ref}_i) + \Pr(\text{Dist}_{q,i} = X \mid \text{que} \neq \text{Ref}_i))$$

The likelihoods  $\Pr(\text{Dist}_{q,i} = X \mid \text{que} = \text{Ref}_i)$  and  $\Pr(\text{Dist}_{q,i} = X \mid \text{que} \neq \text{Ref}_i)$  are computed directly from the estimated distributions of module profile distances between replicates (approximated using an exponential distribution) and between different tissues and cell types (approximated using a normal distribution) from the training data. Distances are based on gene set (rather than individual gene) profiles, and gene sets were determined by clustering approximately 20,000 genes across the 44 cell types and tissues using WGCNA (Zhang and Horvath, 2005). The output of the classifier is vector of probabilities. To test whether the classification results were biased due to the inclusion of diverse cell types in the training data, we constructed the classifier de novo using only hematopoietic populations (HSCs, CMPs, GMPs, MEPs, macrophages, granulocytes, T-cells, B-cells, natural killer cells, mast cells, and dendritic cells). When we applied this classifier to our developmental gene expression profiles, we found that the results were highly similar to the original classification results, with AGM and FL12 A still classified as macrophages, and Definitive samples as HSPCs (Figure S3B). To test the overall

performance of the classifier, we applied it to a validation data set of 1,300 publicly available gene expression profiles (GSE10733, GSE10744, GSE11056, GSE11110, GSE11207, GSE11220, GSE12464, GSE12545, GSE13032, GSE13155, GSE13224, GSE13402, GSE13526, GSE13753, GSE13805, GSE13873, GSE14270, GSE15129, GSE16073, GSE16150, GSE16364, GSE16994, GSE17263, GSE17923, GSE18500, GSE18669, GSE18746, GSE19299, GSE19403, GSE20352, GSE21754, GSE21842, GSE22527, GSE22935, GSE2389, GSE2869, GSE3203, GSE3440, GSE3554, GSE3653, GSE4035, GSE4040, GSE4142, GSE4413, GSE4816, GSE5127, GSE5296, GSE5763, GSE6210, GSE6461, GSE6466, GSE6506, GSE6514, GSE6591, GSE6623, GSE6676, GSE6686, GSE7069, GSE7196, GSE7333, GSE7381, GSE7407, GSE7764, GSE7793, GSE7798, GSE8000, GSE8044, GSE8199, GSE8249, GSE8582, GSE9630, GSE9711, GSE9810, GSE9913, GSE9954, GSE24637, GSE25140, GSE10627, GSE21018, GSE12982), demonstrating that the classifier achieved a sensitivity of 94% at a false positive rate <5% (data not shown).

We used the same training data (130 gene expression profiles) and gene sets described above to reconstruct the gene regulatory networks of adult cell types and tissues. We searched for potential gene set regulators by computing the Pearson correlation coefficient between the expression level of each transcription factor and each gene set profile both globally (using all cell types and tissues) and in a context-specific manner (using only the subset of cell types and tissues that share a developmental origin). Reasoning that TFs central to module regulation would also be highly correlated to the same gene set profiles in independent data sets of the same cell types and tissues, we computed TF and gene set correlations in the validation data set (1,300 publicly available gene expression profiles) and removed relationships in which either the direction of the correlation differed or was not significant.

#### *Companion website*

There is more information within our data set than can be described in detail here. Furthermore, we believe that this data and analyses will be informative beyond our focus on the development of the HSC. For example, our analyses can be further leveraged to determine the extent to which the developmental programs are re-activated in cancer, or in diverse physiological conditions. In the hope that other investigators will leverage this resource to complement their research, we created a website and database

(<http://hsc.hms.harvard.edu>) to facilitate data mining and data integration. We designed the website to be user-friendly so that visitors can quickly perform one-off queries (e.g. “What is the expression profile of my gene in HSC development?”). We also implemented a feature to allow visitors to upload a gene list and the website will determine the modules in which the gene list is enriched. We also provide access to all the data and analysis results, so that visitors can use more sophisticated tools to mine the data (e.g. GSEA). A complete list of the website features is below:

- (1) Download normalized data, the transcriptional regulatory network in Cytoscape format, the sample annotation table, and a .GMT file containing the modules for use with Gene Set Enrichment Analysis (GSEA).
- (2) View the expression profiles of selected genes.
- (3) Explore the genes differentially expressed by pair-wise comparison between individual biological groups (e.g. AGM vs YS) and between HSC states (e.g. Definitive vs Specifying).
- (4) Explore each module by viewing module profiles, and by viewing the gene members.
- (5) Find the predicted transcriptional regulators of modules.
- (6) Determine whether a user-supplied gene list is enriched in any of the modules.

The website’s FAQ fully describes how the resource can be used. All genes listed on the website are linked to NCBI’s Entrez Gene and MGI, providing a source of up-to-date annotation.

## Supplemental References

- Bolstad, B.M., Irizarry, R.A., Astrand, M., and Speed, T.P. (2003). A comparison of normalization methods for high density oligonucleotide array data based on variance and bias. *Bioinformatics* 19, 185-193.
- Draper, B.W., Morcos, P.A., and Kimmel, C.B. (2001). Inhibition of zebrafish fgf8 pre-mRNA splicing with morpholino oligos: a quantifiable method for gene knockdown. *Genesis* 30, 154-156.
- Gekas, C., Dieterlen-Lievre, F., Orkin, S.H., and Mikkola, H.K. (2005). The placenta is a niche for hematopoietic stem cells. *Dev Cell* 8, 365-375.
- Gentleman, R.C., Carey, V.J., Bates, D.M., Bolstad, B., Dettling, M., Dudoit, S., Ellis, B., Gautier, L., Ge, Y., Gentry, J., *et al.* (2004). Bioconductor: open software development for computational biology and bioinformatics. *Genome Biol* 5, R80.
- Irizarry, R.A., Hobbs, B., Collin, F., Beazer-Barclay, Y.D., Antonellis, K.J., Scherf, U., and Speed, T.P. (2003). Exploration, normalization, and summaries of high density oligonucleotide array probe level data. *Biostatistics* 4, 249-264.
- Johnson, W.E., Li, C., and Rabinovic, A. (2007). Adjusting batch effects in microarray expression data using empirical Bayes methods. *Biostatistics* 8, 118-127.
- Kyba, M., Perlingeiro, R.C., and Daley, G.Q. (2002). HoxB4 confers definitive lymphoid-myeloid engraftment potential on embryonic stem cell and yolk sac hematopoietic progenitors. *Cell* 109, 29-37.
- Lawrence, H.J., Helgason, C.D., Sauvageau, G., Fong, S., Izon, D.J., Humphries, R.K., and Largman, C. (1997). Mice bearing a targeted interruption of the homeobox gene HOXA9 have defects in myeloid, erythroid, and lymphoid hematopoiesis. *Blood* 89, 1922-1930.
- Lin, H.F., Traver, D., Zhu, H., Dooley, K., Paw, B.H., Zon, L.I., and Handin, R.I. (2005). Analysis of thrombocyte development in CD41-GFP transgenic zebrafish. *Blood* 106, 3803-3810.
- McKinney-Freeman, S.L., Naveiras, O., Yates, F., Loewer, S., Philitas, M., Curran, M., Park, P.J., and Daley, G.Q. (2009). Surface antigen phenotypes of hematopoietic stem cells from embryos and murine embryonic stem cells. *Blood* 114, 268-278.
- Mitchell, T. (1997). *Machine Learning* (McGraw Hill).
- Pevny, L., Simon, M.C., Robertson, E., Klein, W.H., Tsai, S.F., D'Agati, V., Orkin, S.H., and Costantini, F. (1991). Erythroid differentiation in chimaeric mice blocked by a targeted mutation in the gene for transcription factor GATA-1. *Nature* 349, 257-260.
- Scott, E.W., Simon, M.C., Anastasi, J., and Singh, H. (1994). Requirement of transcription factor PU.1 in the development of multiple hematopoietic lineages. *Science* 265, 1573-1577.
- Shepard, J.L., Amatruda, J.F., Stern, H.M., Subramanian, A., Finkelstein, D., Ziai, J., Finley, K.R., Pfaff, K.L., Hersey, C., Zhou, Y., *et al.* (2005). A zebrafish bmyb mutation causes genome instability and increased cancer susceptibility. *Proc Natl Acad Sci U S A* 102, 13194-13199.
- Thisse, C., and Thisse, B. (2008). High-resolution in situ hybridization to whole-mount zebrafish embryos. *Nat Protoc* 3, 59-69.

Zhang, B., and Horvath, S. (2005). A general framework for weighted gene co-expression network analysis. *Stat Appl Genet Mol Biol* 4, Article17.
